# Supplementary material for: Uranyl peroxide pyrophosphate cage clusters with oxalate and nitrate bridges
Source: Royal Society of Chemistry journal article supplement (doi:10.1039/c2dt30229b), 2012-01-01
Supplement: c2dt30229b.pdf [file c2dt30229b.pdf]

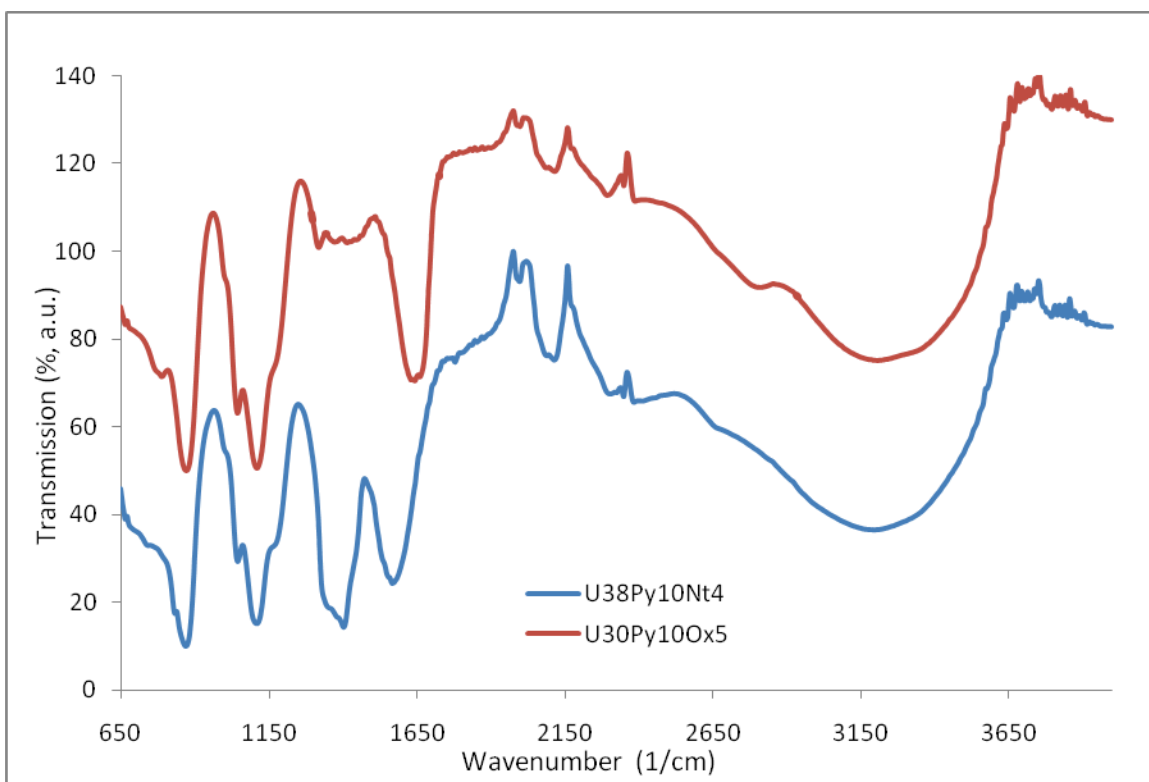

**Figure S1.** Infrared spectra of  $U_{30}Py_{10}Ox_5$  (red) and  $U_{38}Py_{10}Nt_4$  (blue).

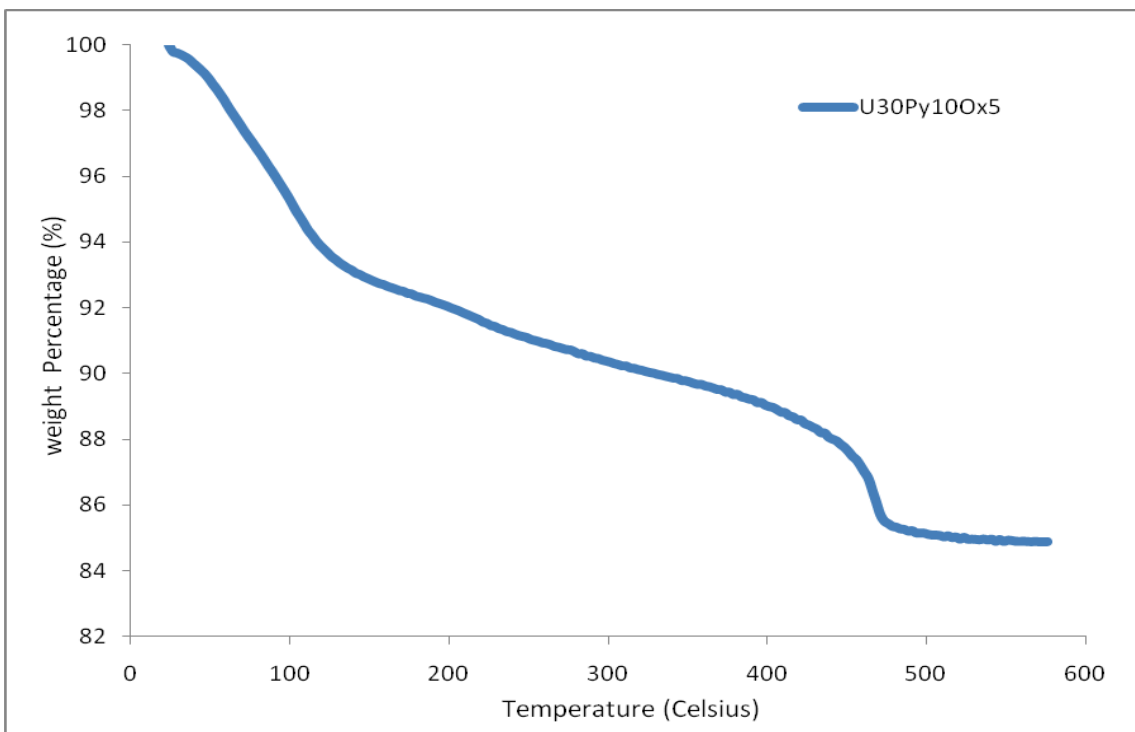

**Figure S2.** Thermal gravimetric analysis profile for U<sub>30</sub>Py<sub>10</sub>Ox<sub>5</sub>.
